# Supplementary material
Source: PubMed Central journal article supplement (PMC6456555)
Supplement: ajtr0011-1498-f8.pdf [file ajtr0011-1498-f8.pdf]

## Fetuin B aggravates LXR-mediated hepatic steatosis through AMPK

**Supplementary Table 1.** Primer sequences in real-time quantitative PCR

---

| PCR (Human)                |                                |
|----------------------------|--------------------------------|
| CPT1 $\alpha$ : sense      | 5'-TCCAGTTGGCTTATCGTGGTG-3'    |
| CPT1 $\alpha$ : anti-sense | 5'-TCCAGAGTCCGATTGATTTTTGC-3'  |
| MLYCD: sense               | 5'-ACGTCCGGGAAATGAATGGG-3'     |
| MLYCD: anti-sense          | 5'-GTAACCCGTTCTAGGTTCAGGA-3'   |
| FAS: sense                 | 5'-AAGGACCTGTCTAGGTTTGATGC-3'  |
| FAS: anti-sense            | 5'-TGGCTTCATAGGTGACTTCCA-3'    |
| ACC: sense                 | 5'-CATGCGGTCTATCCGTAGGTG-3'    |
| ACC: anti-sense            | 5'-GTGTGACCATGACAACGAATCT-3'   |
| SCD1: sense                | 5'-TCTAGCTCCTATACCACCACCA-3'   |
| SCD1: anti-sense           | 5'-TCGTCTCCAACCTATCTCCTCC-3'   |
| GAPDH: sense               | 5'-TCAACGACCACTTTGTCAAGCTCA-3' |
| GAPDH: anti-sense          | 5'-GCTGGTGGTCCAGGGGTCTTACT-3'  |
| PCR (Mouse)                |                                |
| CPT1 $\alpha$ : sense      | 5'-TGGCATCATCACTGGTGTGT-3'     |
| CPT1 $\alpha$ : anti-sense | 5'-GTCTAGGGTCCGATTGATCTTTG-3'  |
| MLYCD: sense               | 5'-GCACGTCCGGGAAATGAAC-3'      |
| MLYCD: anti-sense          | 5'-GCCTCACACTCGCTGATCTT-3'     |
| FAS: sense                 | 5'-GGAGGTGGTGATAGCCGGTAT-3'    |
| FAS: anti-sense            | 5'-TGGGTAATCCATAGAGCCCAG-3'    |
| ACC: sense                 | 5'-CTCCCGATTCATAATTGGGTCTG-3'  |
| ACC: anti-sense            | 5'-TCGACCTTGTTTTACTAGGTGC-3'   |
| SCD1: sense                | 5'-TTCTTGCGATACACTCTGGTGC-3'   |
| SCD1: anti-sense           | 5'-CGGGATTGAATGTTCTTGTGCGT-3'  |
| $\beta$ -actin: sense      | 5'-CCAGTTGGTAACAATGCCATGT-3'   |
| $\beta$ -actin: anti-sense | 5'-CCAGTTGGTAACAATGCCATGT-3'   |

---
